# Supplementary material
Source: HighWire-hosted journal article supplement (doi:10.1101/rna.072066.119)
Supplement: Supplemental_Figures_Table.docx [file Supplemental_Figures_Table.docx]

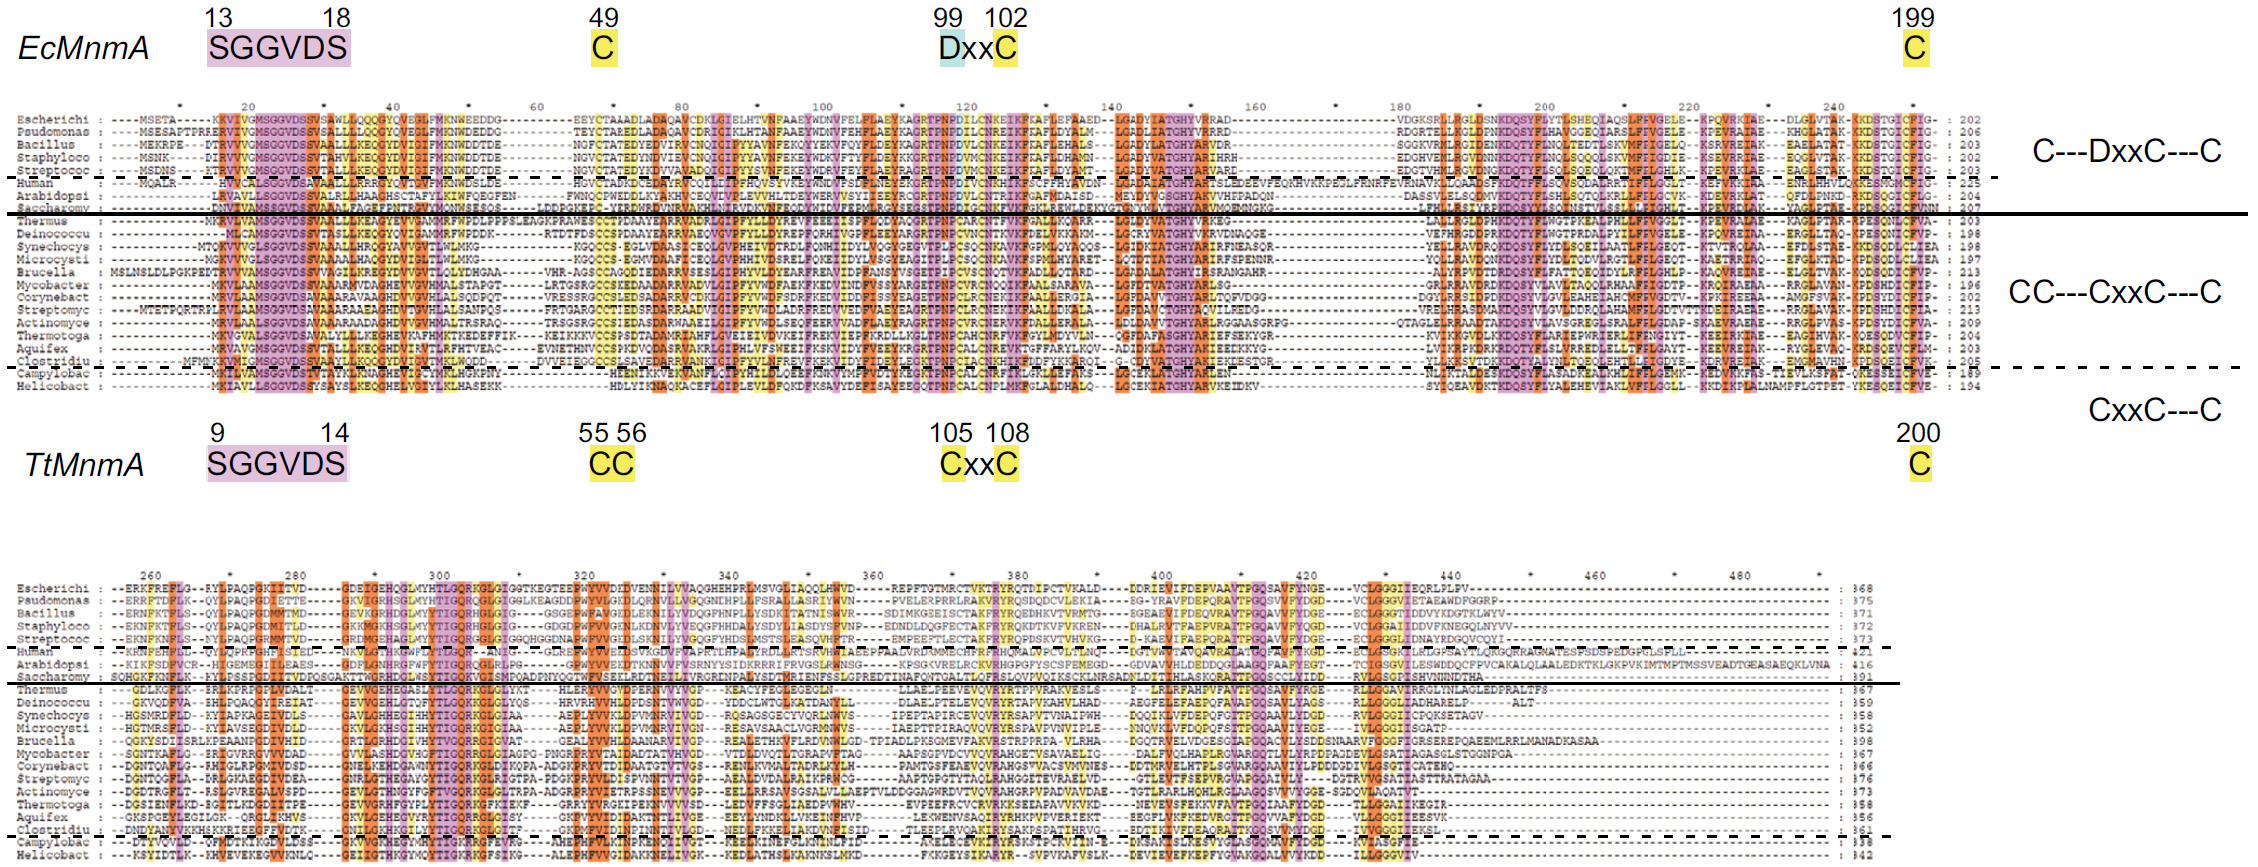


**Supplementary Figure S1. Sequence alignment of MnmAs from several bacteria and eukaryotes.**

MnmA orthologs were retrieved by a BLAST search with TtMnmA as the query. These sequences were aligned with the CLUSTAL X2 program and visualized with the GeneDoc program. Schematic representation of conserved motifs in the *E. coli* and *T. thermophilus* MnmAs is depicted above and below the alignment, respectively. MnmAs from the following species were included: *E.* *coli* K-12, *Pseudomonas* *aeruginosa* PAO1, *Bacillus* *subtilis* 168, *Staphylococcus* *aureus* RF122, *Streptococcus* *pneumoniae* D39, *Homo* *sapiens*, *Arabidopsis* *thaliana*, *Saccharomyces* *cerevisiae* S288C, *T.* *thermophiles* HB27, *Deinococcus* *radiodurans* R1, *Synechocystis* PCC6803, *Microcystis* *aeruginosa* NIES-843, *Brucella* *abortus* 63/168, *Mycobacterium* *tuberculosis* H37Rv, *Corynebacterium* *diphtheriae* rz356, *Streptomyces* *coelicolor* A3(2), *Actinomyces* *israeli* DSM 43320, *Thermotoga* *maritima* MSB8, *Aquifex* *aeolicus* VF5, *Clostridioides* difficile 630, *Campylobacter* *jejuni* W1, and *Helicobacter* *pylori* GAM121Aii. Note that the N-terminal signal sequences of the *A. thaliana* and *S. cerevisiae* MnmAs are not included in this alignment.

**Supplementary Figure S2. LC/MS detection of** **mnm5s2U and mnm5U in *T. thermophilus* tRNAs (A) and *E. coli* total RNA (B).**

UV chromatograms (254 nm) and mass chromatograms (m/z = 304.1 and 288.1) (upper panels), collision-induced dissociation (CID) mnm5s2U spectra (middle panels), and CID mnm5U spectra (lower panels) are shown. In the mass spectra for both mnm5s2U and mnm5U, the parent ion (MH+), the base ion (BH2+), and their derivatives were detected. The “-31” ions were derived from the side groups of methylaminomethyl moieties (loss of CH3NH2), and the “-49” ions resulted from further loss of H2O from the “-31” species. Asterisks (*) indicate non-specific signals derived from the detector.


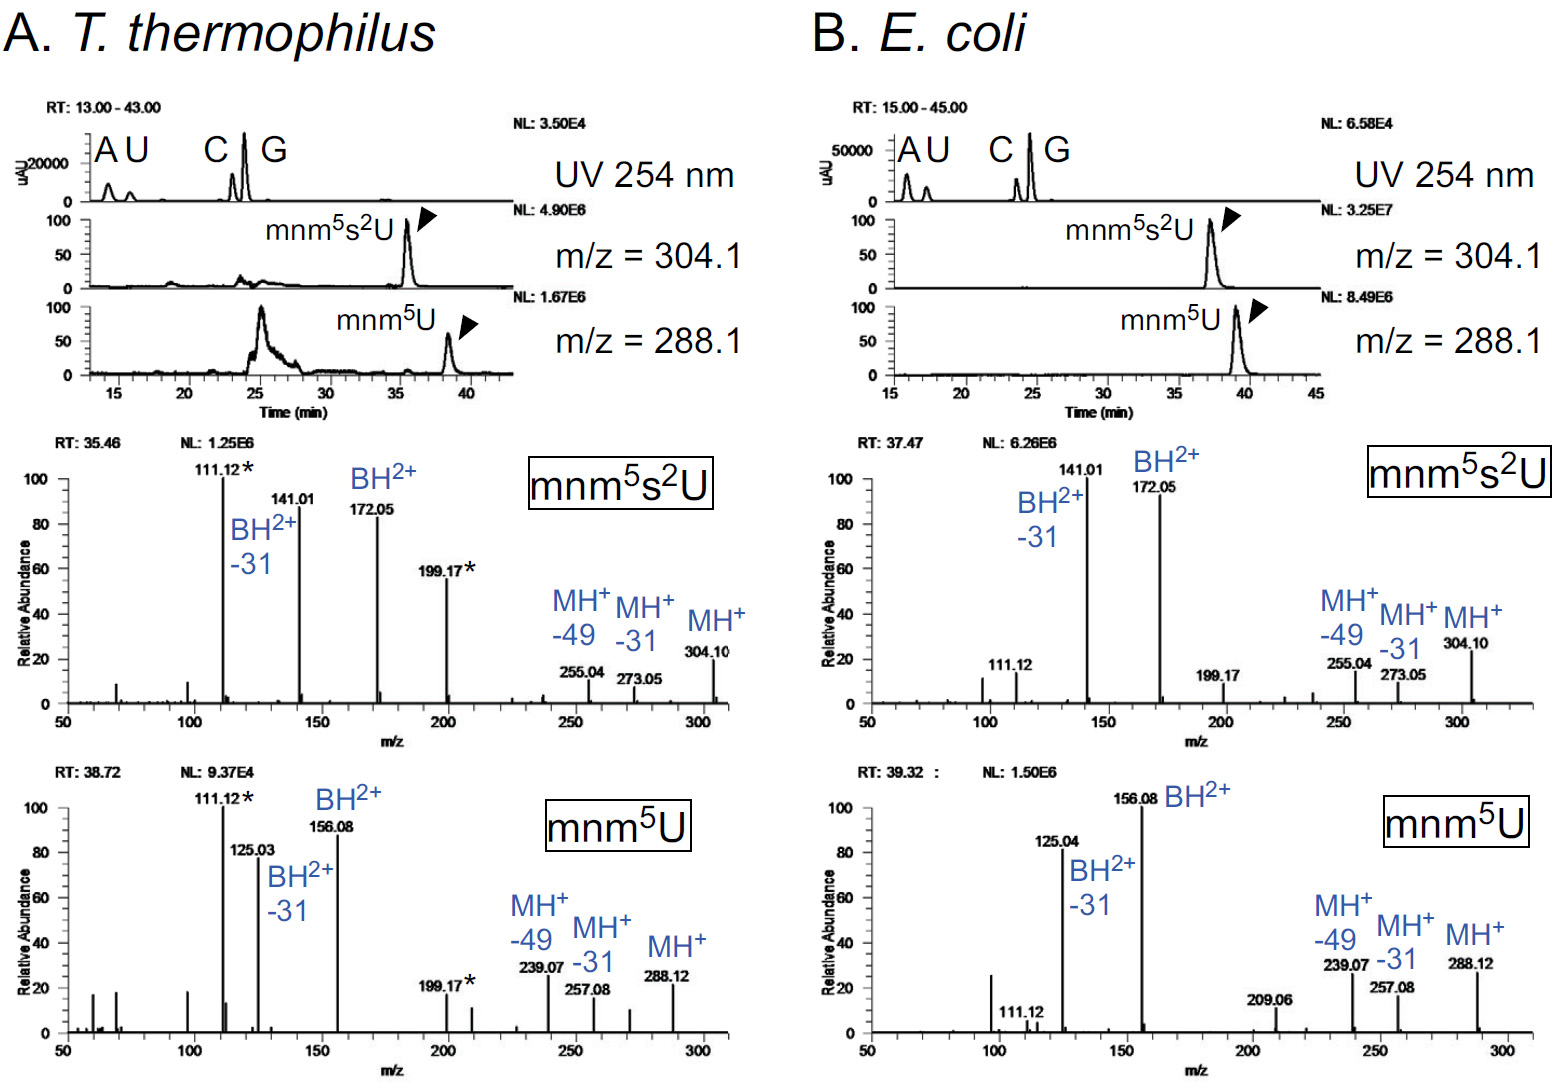


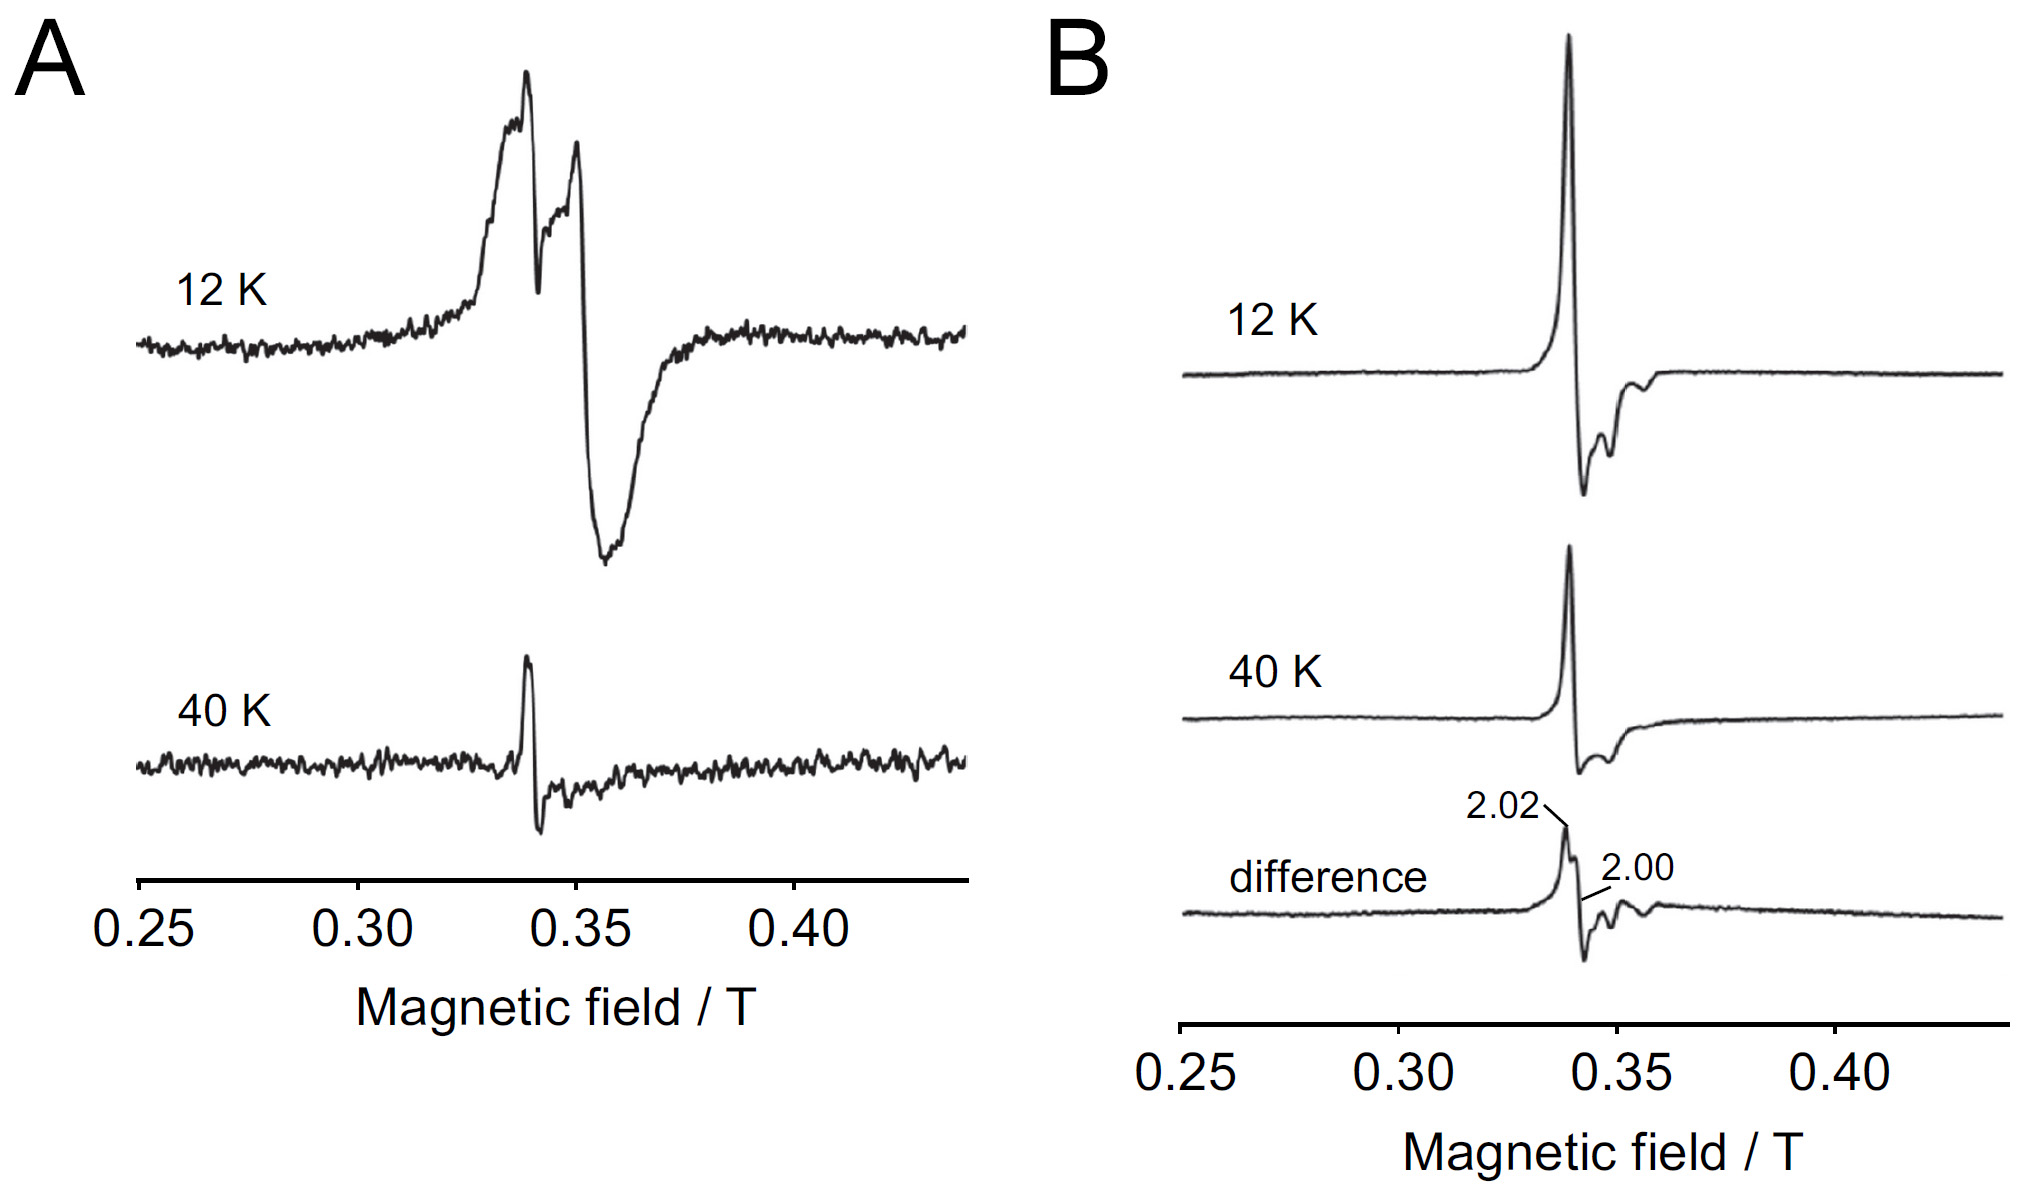


**Supplementary Figure S3. EPR spectra of reduced (A) and oxidized (B) MnmA at 12 and 40 K.**

The experimental conditions were the same as those in Fig. 2, except for the temperatures. The difference spectrum in **B** was obtained by subtracting the 40K spectrum from the 12K spectrum with an appropriate coefficient.


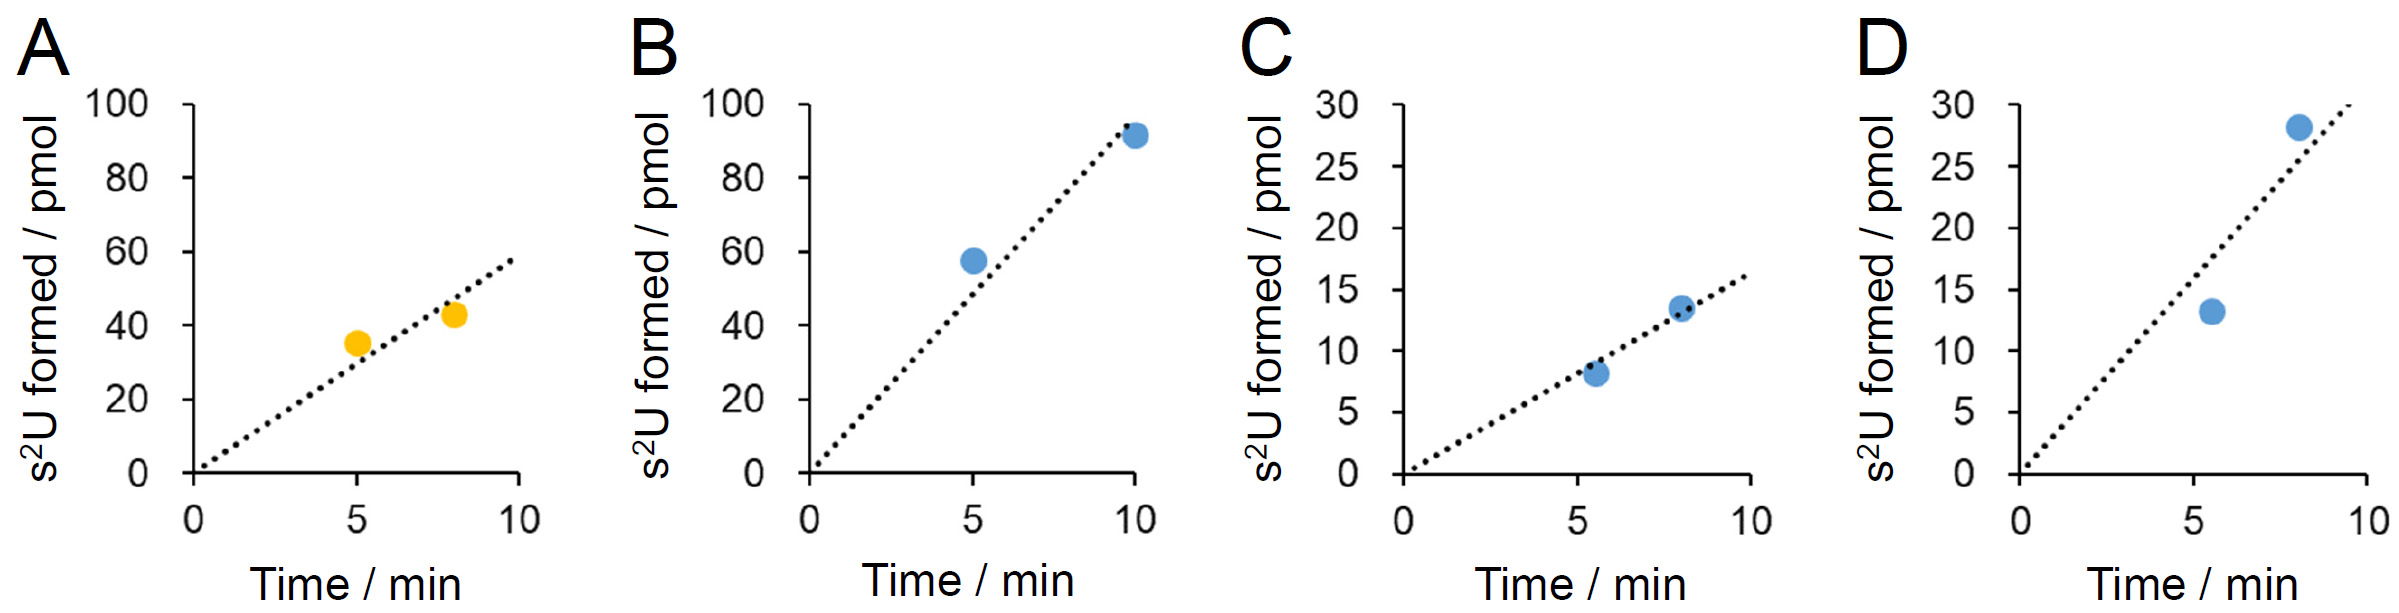


**Supplementary Figure S4. Details of the determination of initial velocities of s2U formation by TtMnmA.**

The standard assay was performed at 60 °C for 5–30 min in 60 µl of H buffer containing 2.5 mM ATP, 0.1 mM Na2S, 450 pmol of tRNA, and 9.4–75 pmol of holo-MnmA. After the reactions, the amount of s2U formed was quantified as described in the **MATERIALS AND METHODS** section.

To determine the initial velocity of wild-type MnmA, we plotted time curves of s2U formation for tRNAGln (A) and tRNALys (B) with 12.5 pmol of MnmA. The assay with tRNAGln for 8 min was repeated in triplicate, the amount of s2U formed was quantified, and the initial velocity was determined. For determination of the initial velocities of wild-type and mutant (C55A, C56A, and C55AC56A) MnmAs, 9.4 pmol of MnmA and tRNALys were incubated for 10 min in triplicate and the amount of s2U formed was quantified. For the C200A mutant, the amount of s2U formed by 19 pmol of MnmA in 10 min was quantified in triplicate, and for the C105A mutants, the amount of s2U formed by 75 pmol of MnmA in 30 min was quantified in triplicate because the activity of these mutants is too weak to accurately quantify s2U otherwise. For D13A, C108A, and C105AC108AC200A mutants, no s2U formation was detected in assays containing 75 pmol of MnmA for 30min.

For cysteine desulfurase-coupled reactions, we plotted time curves of s2U formation for tRNALys with 12.5 pmol of MnmA and 75 pmol of IscS (C) or SufS (D) under non-reducing conditions. Assays lasting 8 min were repeated in triplicate, the amount of s2U formed was quantified, and the initial velocity was determined.


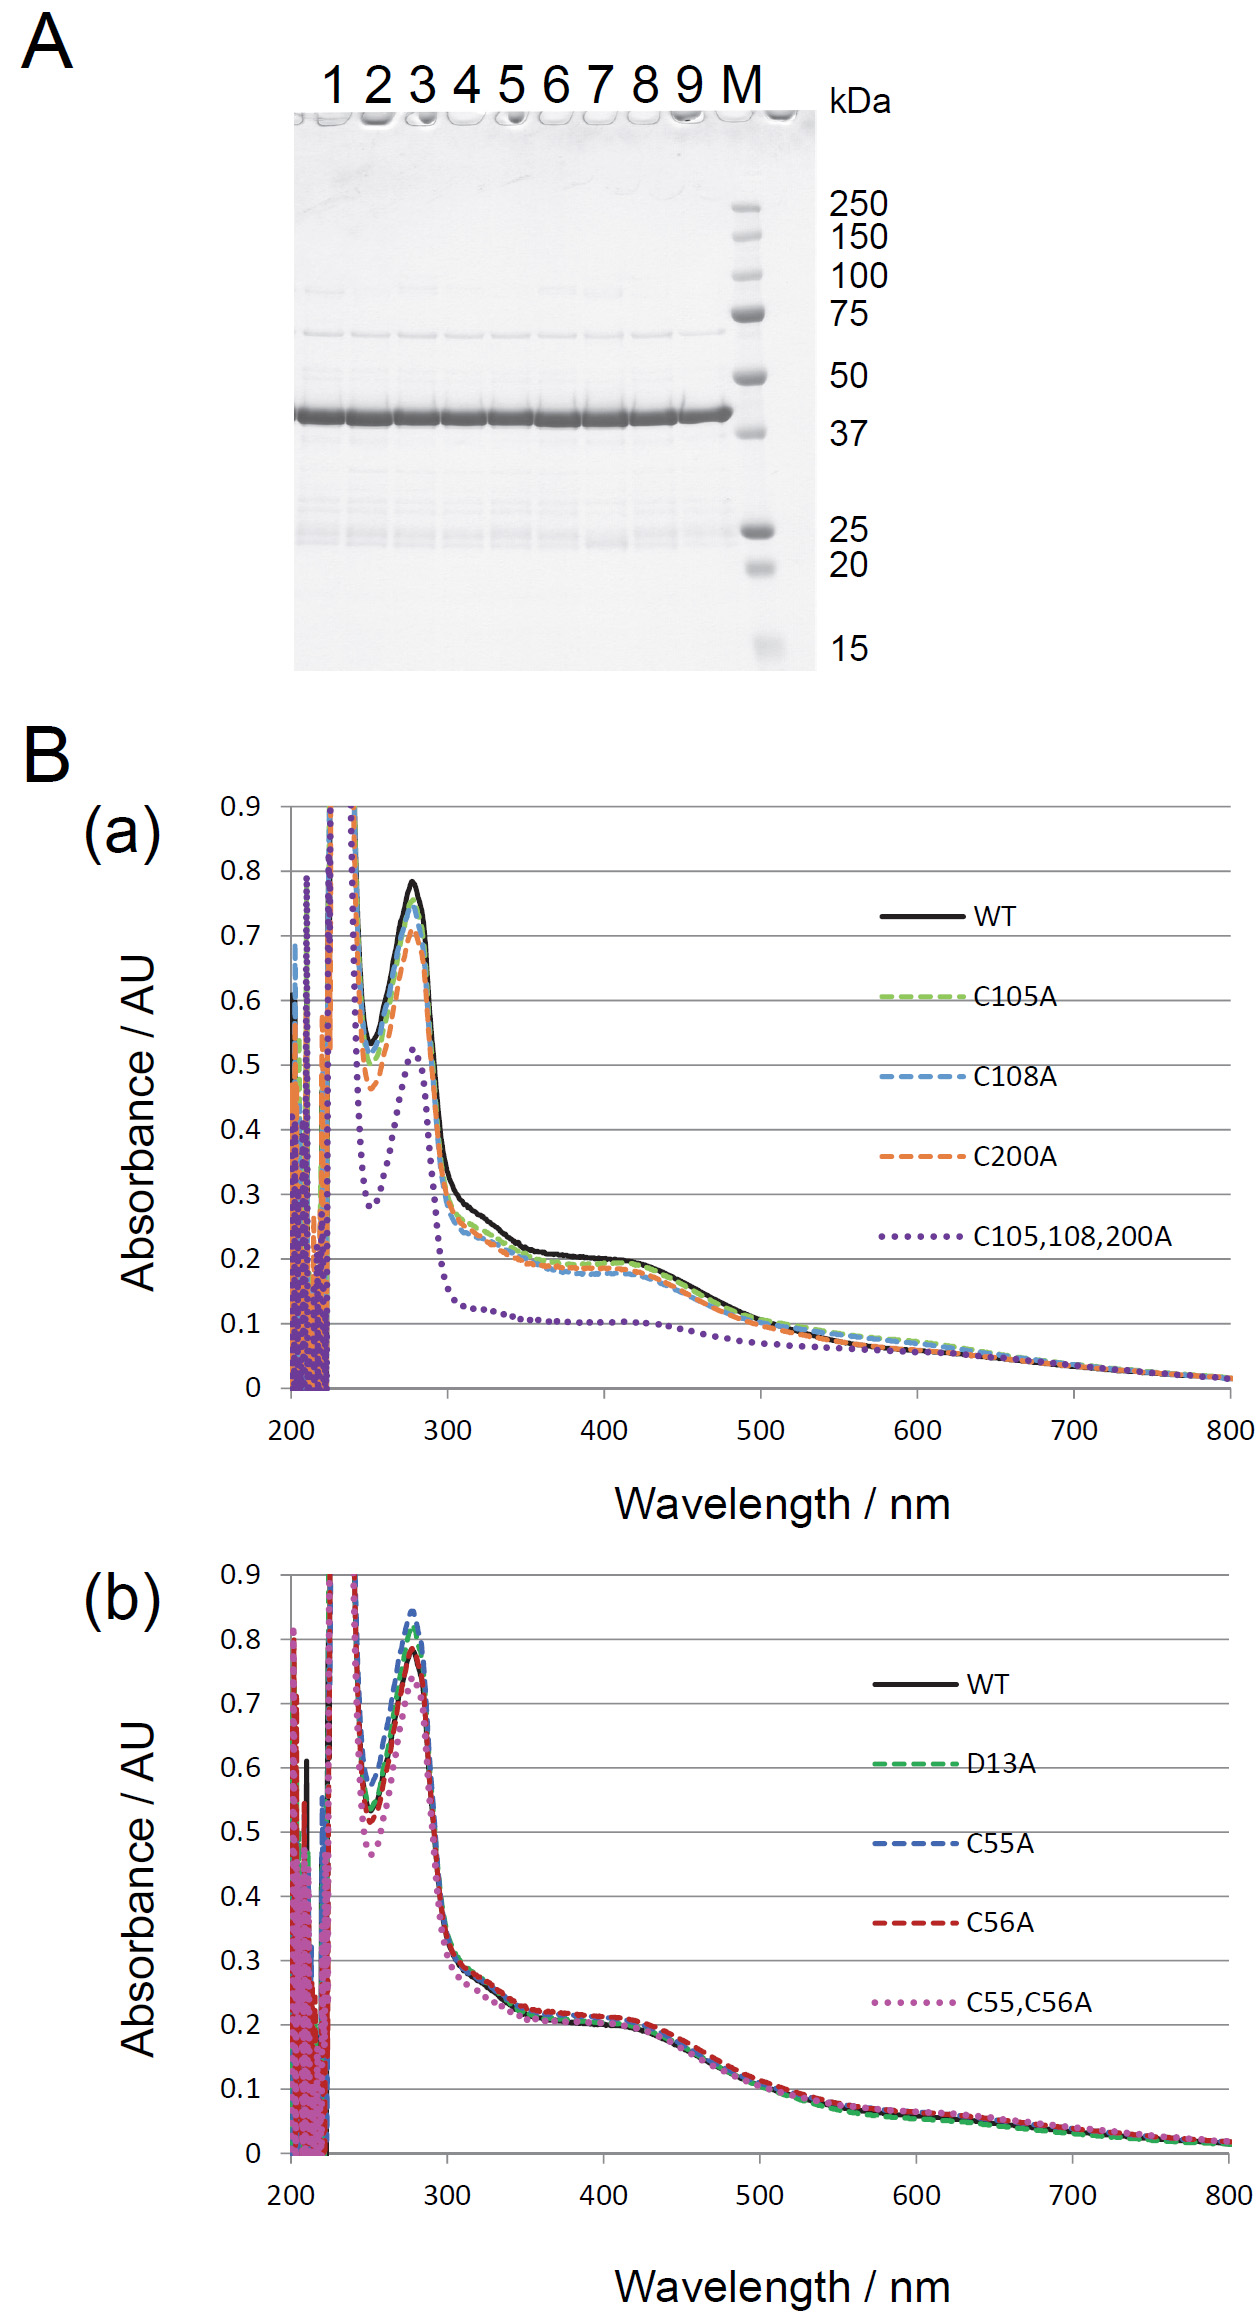


**Supplementary Figure S5. Recombinant MnmAs.**

**A.** SDS-PAGE analysis of MnmAs. Four micrograms of each MnmA were separated by 10−20% PAGE and stained with CBB. Wild type (lane 1), D13A (lane 2), C55A (lane 3), C56A (lane 4), C55,56A (lane 5), C105A (lane 6), C108A (lane 7), C200A (lane 8), C105,108,200A (lane 9), and Marker (lane M) are shown.

**B.** UV-VIS spectra of reconstituted MnmA proteins with mutations in the three Cys residues in the catalytic center (a) or in other residues (b) are shown. The samples were diluted to 0.7 mg/ml in A buffer, and the spectra were recorded.

**Supplementary Table S1.** **Primer list for TtMnmA and Tt-tRNA-Lys(K)/Gln(Q) cloning**

For the TtMnmA cloning (restriction sites are underlined):

| TtMnmA-Nde-F | agccagctcatatgaagcgggttctcgtggccatgtcc |
| --- | --- |
| TtMnmA-Hind-R | gagctaagcttggagaaggtcaaggcccggggatcc |

For the TtMnmA mutant construction (mutations introduced are shown in capital letters):

| MnmA-QC-D13A-F | ccatgtccgggggggtggCctcctccgtggccgcc |
| --- | --- |
| MnmA-QC-D13A-R | ggcggccacggaggagGccacccccccggacatgg |
| MnmA-QC-C55A-F | cgggcctgggagagcGCctgcaccccggacgccgc |
| MnmA-QC-C55A-R | gcggcgtccggggtgcagGCgctctcccaggcccg |
| MnmA-QC-C56A-F | cgggcctgggagagctgcGCcaccccggacgccgc |
| MnmA-QC-C56A-R | gcggcgtccggggtgGCgcagctctcccaggcccg |
| MnmA-QC-C55AC56A-F | cgggcctgggagagcGCcGCcaccccggacgccgc |
| MnmA-QC-C55AC56A-R | gcggcgtccggggtgGCgGCgctctcccaggcccg |
| MnmA-QC-C105A-F | cgcaccccgaaccccGCcgcccggtgcaacaccttcgtcaagttc |
| MnmA-QC-C105A-R | gaacttgacgaaggtgttgcaccgggcgGCggggttcggggtgcg |
| MnmA-QC-C108A-F | cgcaccccgaacccctgcgcccggGCcaacaccttcgtcaagttc |
| MnmA-QC-C108A-R | gaacttgacgaaggtgttgGCccgggcgcaggggttcggggtgcg |
| MnmA-QC-C105AC108A-F | cgcaccccgaaccccGCcgcccggGCcaacaccttcgtcaagttc |
| MnmA-QC-C105AC108A-R | gaacttgacgaaggtgttgGCccgggcgGCggggttcggggtgcg |
| MnmA-QC-C200A-F | cccgaaagccagaacctcGCcttcgtggccggcgacctc |
| MnmA-QC-C200A-R | gaggtcgccggccacgaagGCgaggttctggctttcggg |

For the tRNA cloning (restriction sites are underlined):

| Tt-tRNA-K-F | ggccgaattctaatacgactcactatagggccgttagctcagctggcagagcaaccgacttttaatcgg |
| --- | --- |
| Tt-tRNA-K-R | cgcgcaagcttcctggtgggccgtgcaggattcgaacctgcgacctaccgattaaaagtcggttgctctg |
| Tt-tRNA-Q-U1G-F | ggccgaattctaatacgactcactatagggggcgtcgtctaacggcaggacagcggactttgg |
| Tt-tRNA-Q-R | cgcgcaagcttcctggctggggcgggtggactcgaaccaccaccggcggatccaaagtccgctgtcctg |

For the tRNA mutant construction (mutations introduced are shown in capital letters):

| Tt-tRNA-K-QC-U34A-F | gctggcagagcaaccgactAttaatcggtaggtcgcaggttcg |
| --- | --- |
| Tt-tRNA-K-QC-U34A-R | cgaacctgcgacctaccgattaaTagtcggttgctctgccagc |
| Tt-tRNA-Q-U1G-U34A-F | ggcaggacagcggactAtggatccgccggtggtgg |
| Tt-tRNA-Q-U1G-U34A-R | ccaccaccggcggatccaTagtccgctgtcctgcc |

For PCR amplification of templates for in vitro transcription:

| tRK-F | taatacgactcactatagggccgttagc |
| --- | --- |
| tRK-disc-R | tgggccgtgcaggattcgaacc |
| tRQ-U1G-F | taatacgactcactatagggggcg |
| tRQ-U1G-disc-R | tggggcgggtggactcg |
